# Supplementary material for: Tap water fingerprinting using a convolutional neural network built from images of the coffee-ring effect
Source: Royal Society of Chemistry journal article supplement (doi:10.1039/c9an01624d), 2019-12-30
Supplement: c9an01624d1.pdf [file c9an01624d1.pdf]

## **ELECTRONIC SUPPLEMENTARY INFORMATION (ESI)**

### Tap water fingerprinting using a convolutional neural network built from images of the coffee-ring effect

X. Li, A. R. Sanderson, S. S. Allen, and R. H. Lahr\*

Department of Civil & Environmental Engineering

Michigan State University

1449 Engineering Research Ct.

East Lansing, MI 48824, USA

\*Corresponding author: [rlahr@msu.edu](mailto:rlahr@msu.edu) (R. H. Lahr)

**Table SI-1.** Measured water chemistry data from tap water samples collected across Michigan and treatment information from annual municipal water quality reports and system operators. Averages and standard deviations are listed for values conducted in replicate.

| City                 | F <sup>-</sup><br>(mM) | NO <sub>3</sub> <sup>-</sup><br>(mM) | Zn<br>(mM)           | TOC<br>(ppm) |
|----------------------|------------------------|--------------------------------------|----------------------|--------------|
| MSU - academic hall  | 0.04                   | BD                                   | 2.3×10 <sup>-3</sup> | 3.1          |
| Durand               | 0.03                   | 0.02                                 | BD                   | 1.3          |
| Kalamazoo            | 0.04                   | 0.03                                 | BD                   | BD           |
| Portland             | 0.03                   | BD                                   | BD                   | 2.1          |
| Battle Creek site A  | 0.05                   | BD                                   | 3.9×10 <sup>-3</sup> | 0.79         |
| Battle Creek site B  | 0.05                   | 0.02                                 | BD                   | 1.2          |
| Charlotte            | 0.02                   | 0.01                                 | 1.1×10 <sup>-4</sup> | 1.4          |
| Fowlerville          | 0.04                   | BD                                   | BD                   | 1.4          |
| Lansing site A       | 0.01                   | 0.01                                 | 1.2×10 <sup>-4</sup> | 1.5          |
| Lansing site B       | 0.03                   | 0.01                                 | 9.1×10 <sup>-4</sup> | 1.5          |
| East Lansing         | 0.02                   | 0.03                                 | 6.3×10 <sup>-4</sup> | 1.3          |
| Howell               | 0.03                   | BD                                   | 1.5×10 <sup>-4</sup> | BD           |
| MSU - residence hall | 0.05                   | BD                                   | 4.2×10 <sup>-4</sup> | 3.2          |
| Williamston          | 0.03                   | BD                                   | 3.5×10 <sup>-4</sup> | 2.2          |
| Genoa Twp soft       | BD                     | BD                                   | 1.7×10 <sup>-4</sup> | 2.2          |
| Genoa Twp            | BD                     | BD                                   | 1.1×10 <sup>-4</sup> | 2.0          |
| Rest stop Okemos     | 0.03                   | BD                                   | BD                   | 1.1          |
| Rest stop Zeeland    | 0.04                   | BD                                   | 2.8×10 <sup>-3</sup> | 1.0          |
| Rest stop I96/M66    | 0.03                   | BD                                   | 4.9×10 <sup>-4</sup> | 3.3          |
| Rest stop Fenton     | 0.06                   | 0.02                                 | 1.0×10 <sup>-3</sup> | 1.0          |
| Allegan              | 0.03                   | BD                                   | 5.5×10 <sup>-4</sup> | BD           |
| Genoa Twp            | BD                     | BD                                   | 1.2×10 <sup>-4</sup> | BD           |
| Detroit              | 0.03                   | 0.07                                 | 3.2×10 <sup>-3</sup> | 1.6          |
| Flint                | 0.04                   | 0.03                                 | 7.5×10 <sup>-4</sup> | BD           |
| Swartz Creek         | 0.03                   | 0.03                                 | 1.2×10 <sup>-4</sup> | BD           |
| Grand Rapids         | 0.03                   | 0.03                                 | 2.3×10 <sup>-4</sup> | BD           |
| Holland              | 0.04                   | 0.03                                 | 8.9×10 <sup>-4</sup> | BD           |
| Wyoming              | 0.03                   | 0.03                                 | BD                   | BD           |



**Table SI-2.** Composition of synthetic tap water solutions.

| Chemicals                                         | Detroit (mM) | Lansing (mM) | MSU hard water (mM) |
|---------------------------------------------------|--------------|--------------|---------------------|
| NaHCO <sub>3</sub>                                | 0.23         | 0.50         | 0.55                |
| Na <sub>2</sub> SO <sub>4</sub>                   | -            | 1.20         | -                   |
| MgCl <sub>2</sub> (H <sub>2</sub> O) <sub>6</sub> | 0.25         | 0.53         | 0.40                |
| MgSO <sub>4</sub> (H <sub>2</sub> O) <sub>7</sub> | 0.10         | -            | 0.80                |
| MgCO <sub>3</sub>                                 | -            | -            | 0.50                |
| CaCl <sub>2</sub>                                 | -            | 0.56         | -                   |
| CaSO <sub>4</sub>                                 | 0.16         | -            | -                   |
| CaCO <sub>3</sub>                                 | 0.50         | -            | 2.60                |
| KCl                                               | -            | 0.100        | 0.027               |
| KH <sub>2</sub> PO <sub>4</sub>                   | 0.0152       | 0.0100       | 0.0113              |
| NaNO <sub>3</sub>                                 | 0.0725       | 0.0140       | -                   |
| KF(H <sub>2</sub> O) <sub>2</sub>                 | 0.0325       | 0.0270       | 0.0430              |
| FeCl <sub>3</sub>                                 | 0.0016       | -            | 0.0190              |
| CuCl <sub>2</sub> (H <sub>2</sub> O) <sub>2</sub> | 0.0006       | 0.0005       | 0.0020              |

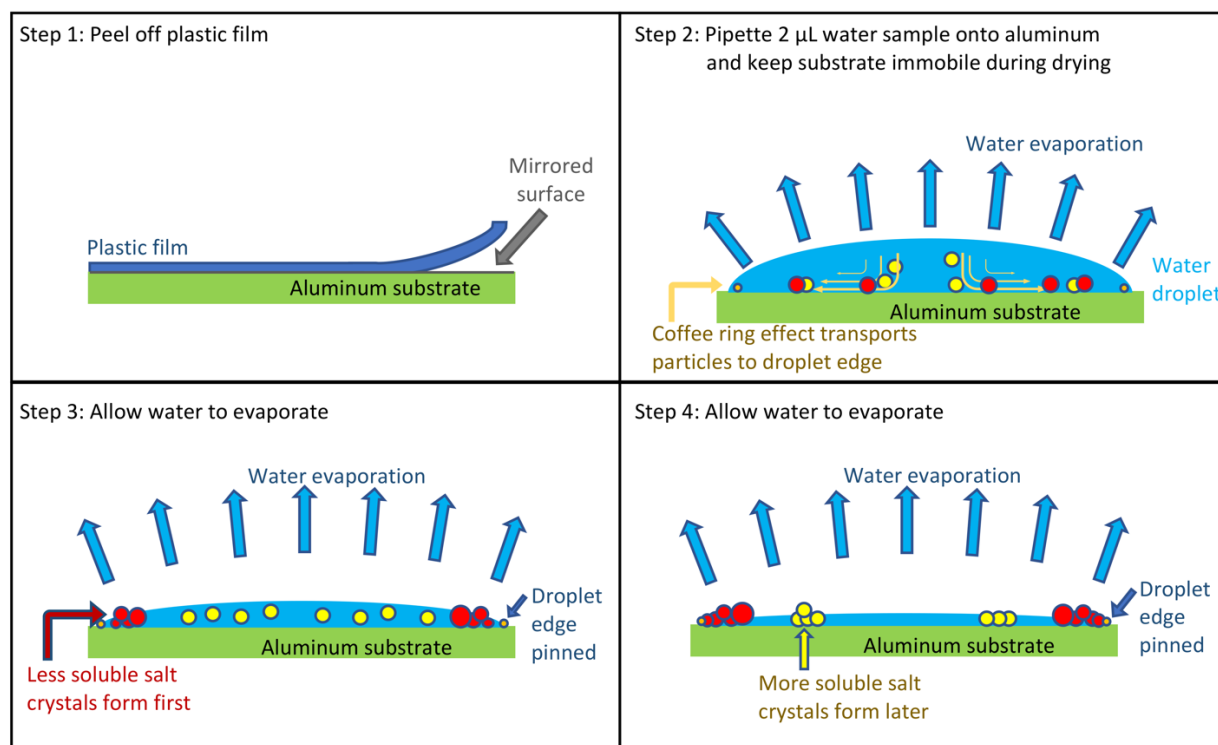**Figure SI-1.** The experimental procedure includes depositing two microliter droplets of an aqueous solution onto an aluminum substrate and allowing it to dry without movement.

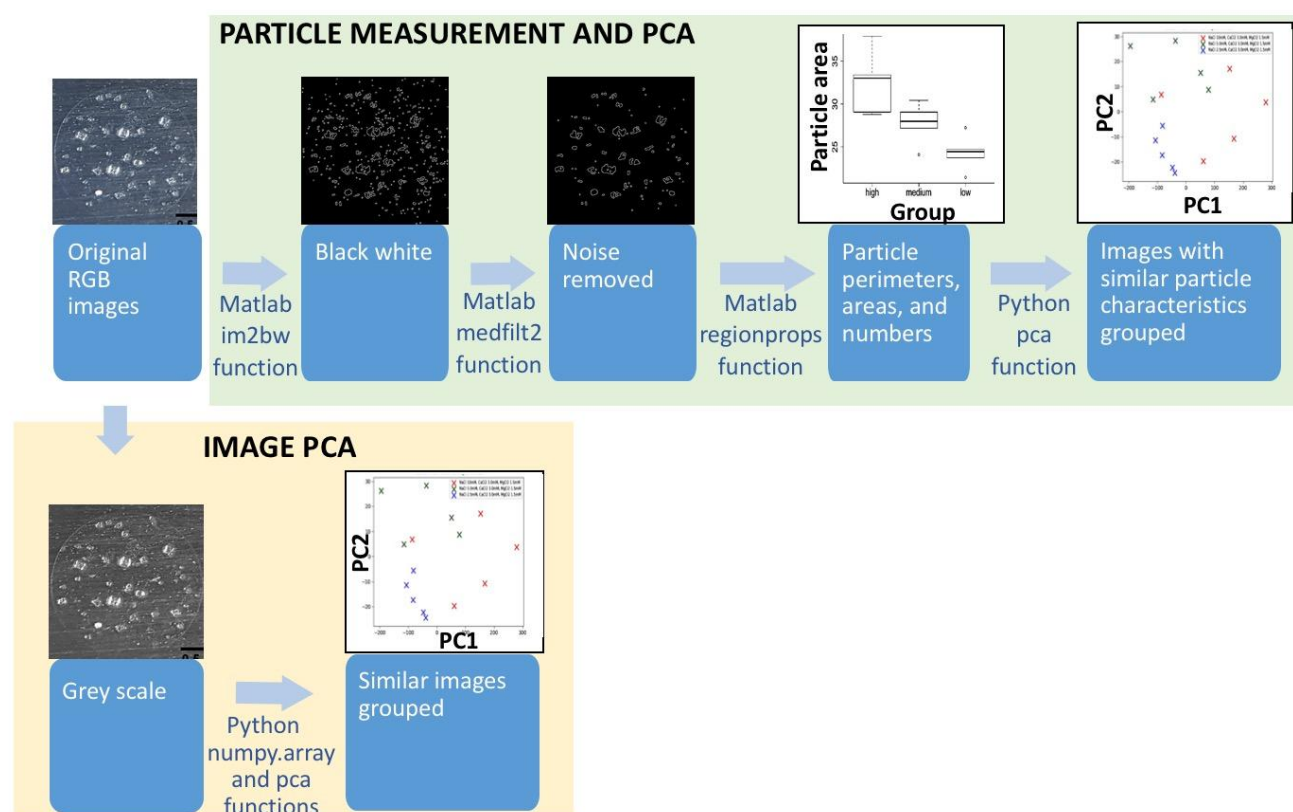

**Figure SI-2.** Image analysis pipeline in Matlab and Python.

**Table SI-3.** Examples of raw and pre-processed images used for the convolutional neural network (CNN) model.

| Water sample        | Detroit | Genoa Township well RO | Genoa Township private well untreated | Howell | Williamston |
|---------------------|---------|------------------------|---------------------------------------|--------|-------------|
| Raw image           |         |                        |                                       |        |             |
| Pre-processed image |         |                        |                                       |        |             |

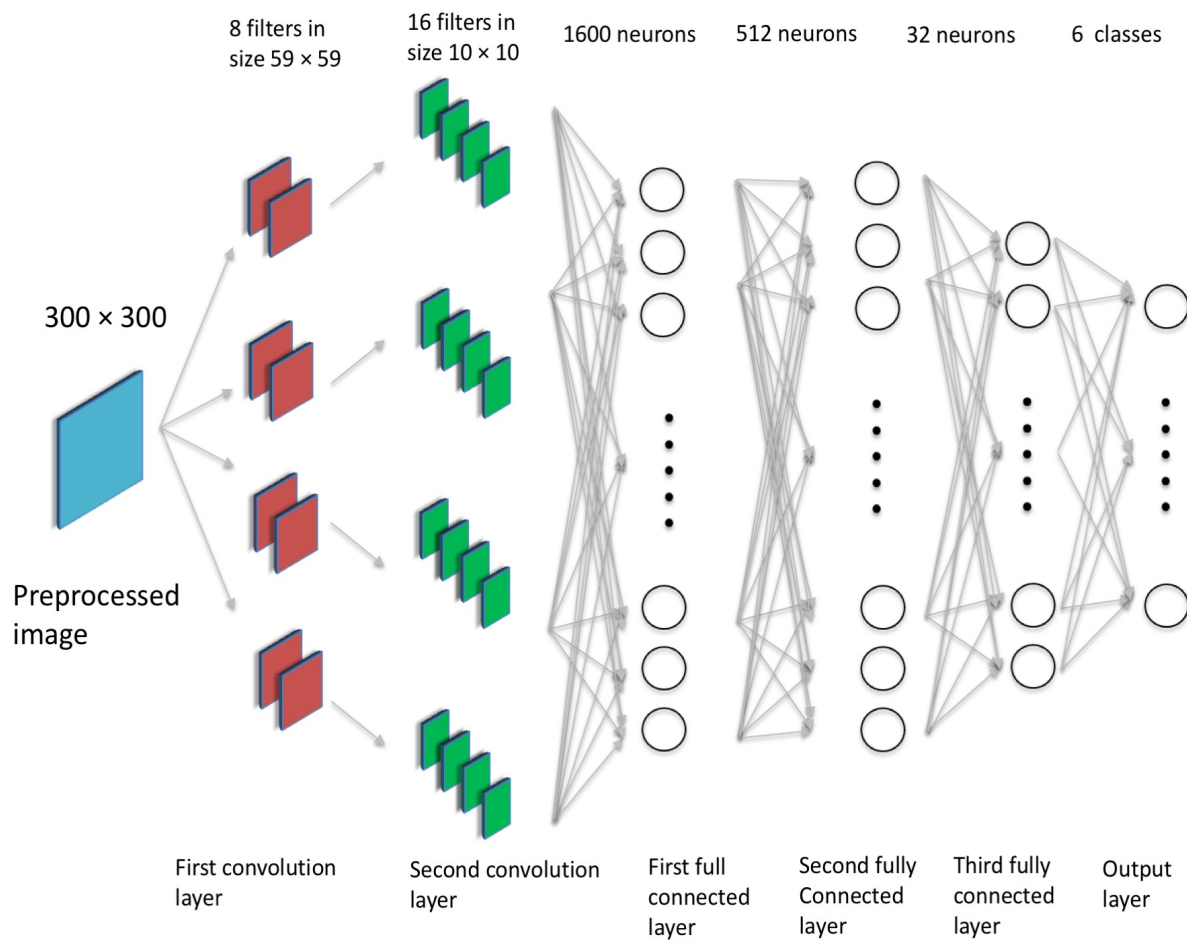

**Figure SI-3.** A schematic of the convolutional neural network (CNN) model.



**Table SI-4.** Five replicates of each freshly collected water sample (stored less than one week). The lab temperature was 24-25 °C and relative humidity 52% for this experiment.

| MINIMALLY TREATED GROUNDWATER                                                       |                                                                                     |                                                                                     |                                                                                     |                                                                                     |                                                                                     |                                                                                      |                                                                                       |                                                                                       |                                                                                       |
|-------------------------------------------------------------------------------------|-------------------------------------------------------------------------------------|-------------------------------------------------------------------------------------|-------------------------------------------------------------------------------------|-------------------------------------------------------------------------------------|-------------------------------------------------------------------------------------|--------------------------------------------------------------------------------------|---------------------------------------------------------------------------------------|---------------------------------------------------------------------------------------|---------------------------------------------------------------------------------------|
| MSU academic hall                                                                   |                                                                                     |                                                                                     |                                                                                     |                                                                                     | Durand                                                                              |                                                                                      |                                                                                       |                                                                                       |                                                                                       |
| 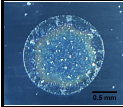   |    |    |    |    |    |    |    |    |    |
| Kalamazoo                                                                           |                                                                                     |                                                                                     |                                                                                     |                                                                                     | Portland                                                                            |                                                                                      |                                                                                       |                                                                                       |                                                                                       |
|    |    |    |    |    |    |    |    |    |    |
| Battle Creek Site A                                                                 |                                                                                     |                                                                                     |                                                                                     |                                                                                     | Battle Creek Site B                                                                 |                                                                                      |                                                                                       |                                                                                       |                                                                                       |
|    |    |    |    |    |    |    |    |    |    |
| Charlotte                                                                           |                                                                                     |                                                                                     |                                                                                     |                                                                                     | Fowlerville                                                                         |                                                                                      |                                                                                       |                                                                                       |                                                                                       |
|    |    |    |    |    |    |    |    |    |    |
| LIME SOFTENED                                                                       |                                                                                     |                                                                                     |                                                                                     |                                                                                     |                                                                                     |                                                                                      |                                                                                       |                                                                                       |                                                                                       |
| Lansing Site A                                                                      |                                                                                     |                                                                                     |                                                                                     |                                                                                     | Lansing Site B                                                                      |                                                                                      |                                                                                       |                                                                                       |                                                                                       |
|    |    |    |    |    |    |    |    |    |    |
| East Lansing                                                                        |                                                                                     |                                                                                     |                                                                                     |                                                                                     | Howell                                                                              |                                                                                      |                                                                                       |                                                                                       |                                                                                       |
|  |  |  |  |  |  |  |  |  |  |
| ION EXCHANGE                                                                        |                                                                                     |                                                                                     |                                                                                     |                                                                                     |                                                                                     |                                                                                      |                                                                                       |                                                                                       |                                                                                       |
| MSU residence hall                                                                  |                                                                                     |                                                                                     |                                                                                     |                                                                                     | Williamston                                                                         |                                                                                      |                                                                                       |                                                                                       |                                                                                       |
|  |  |  |  |  |  |  |  |  |  |
| Genoa Township private well softened                                                |                                                                                     |                                                                                     |                                                                                     |                                                                                     |                                                                                     |                                                                                      |                                                                                       |                                                                                       |                                                                                       |
|  |  |  |  |  |                                                                                     |                                                                                      |                                                                                       |                                                                                       |                                                                                       |
| UNTREATED GROUNDWATER                                                               |                                                                                     |                                                                                     |                                                                                     |                                                                                     |                                                                                     |                                                                                      |                                                                                       |                                                                                       |                                                                                       |
| Genoa Township private well untreated                                               |                                                                                     |                                                                                     |                                                                                     |                                                                                     | Rest stop A - Okemos                                                                |                                                                                      |                                                                                       |                                                                                       |                                                                                       |
|  |  |  |  |  |  |  |  |  |  |
|                                                                                     |                                                                                     |                                                                                     |                                                                                     |                                                                                     |                                                                                     |                                                                                      |                                                                                       |                                                                                       |                                                                                       |

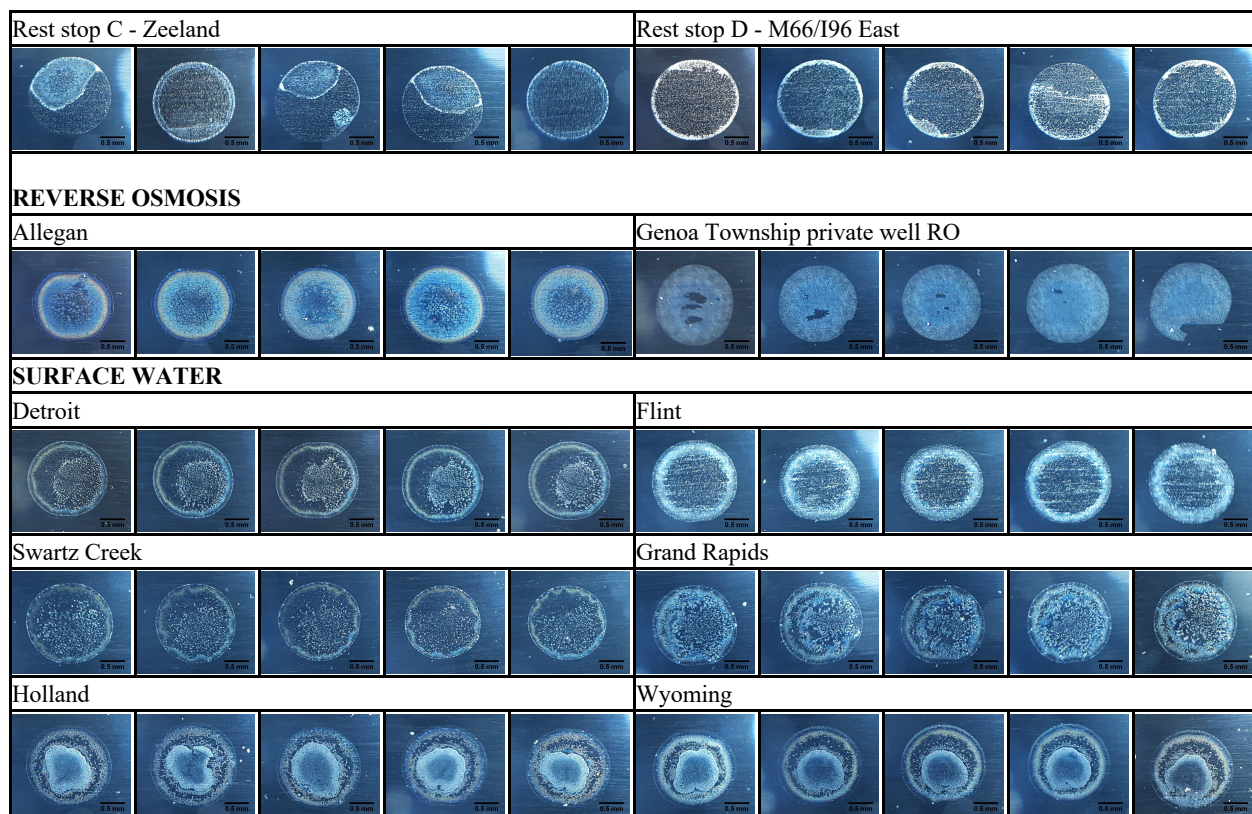



**Table SI-5.** Consistency of tap water residue patterns on different mirrored aluminum slides prepared by different researchers, with nanopure water and synthetic hard freshwater controls. The lab temperature was 24 °C and relative humidity 47%.

|                   | Analyst 1 - Experienced (1 year)                                                   |                                                                                    |                                                                                    | Analyst 2 - Moderate Experience (2.5 months)                                       |                                                                                     |                                                                                      | Analyst 3 - Least Experienced (1 week)                                               |                                                                                      |                                                                                      |
|-------------------|------------------------------------------------------------------------------------|------------------------------------------------------------------------------------|------------------------------------------------------------------------------------|------------------------------------------------------------------------------------|-------------------------------------------------------------------------------------|--------------------------------------------------------------------------------------|--------------------------------------------------------------------------------------|--------------------------------------------------------------------------------------|--------------------------------------------------------------------------------------|
|                   | MSU<br>academic hall<br>Slide 7                                                    | MSU<br>academic hall<br>Slide 8                                                    | MSU<br>academic hall<br>Slide 9                                                    | MSU<br>academic hall<br>Slide 7                                                    | MSU<br>academic hall<br>Slide 8                                                     | MSU<br>academic hall<br>Slide 9                                                      | MSU<br>academic hall<br>Slide 1                                                      | MSU<br>academic hall<br>Slide 2                                                      | MSU<br>academic hall<br>Slide 3                                                      |
| Replicate<br>1    |   |   |   |   |   |   |   |   |   |
| Replicate<br>2    |   |   |   |   |   |   |   |   |   |
| Replicate<br>3    |   |   |   |   |   |   |   |   |   |
| Blank             |   |   |   |   |   |   |   |   |   |
| Synthetic<br>Hard |  |  |  |  |  |  |  |  |  |
|                   |                                                                                    |                                                                                    |                                                                                    |                                                                                    |                                                                                     |                                                                                      |                                                                                      |                                                                                      |                                                                                      |

|                | Analyst 1 - Experienced<br>(1 year)                                                |                                                                                    |                                                                                    | Analyst 2 - Moderate Experienced<br>(2.5 months)                                   |                                                                                     |               | Analyst 3 - Least Experienced<br>(1 week)                                            |                                                                                      |                                                                                      |
|----------------|------------------------------------------------------------------------------------|------------------------------------------------------------------------------------|------------------------------------------------------------------------------------|------------------------------------------------------------------------------------|-------------------------------------------------------------------------------------|---------------|--------------------------------------------------------------------------------------|--------------------------------------------------------------------------------------|--------------------------------------------------------------------------------------|
|                | East Lansing<br>Slide 1                                                            | East Lansing<br>Slide 2                                                            | East Lansing<br>Slide 3                                                            | East Lansing<br>Slide 1                                                            | East Lansing<br>Slide 2                                                             | Slide Damaged | East Lansing<br>Slide 1                                                              | East Lansing<br>Slide 2                                                              | East Lansing<br>Slide 3                                                              |
| Replicate 1    |   |   |   |   |   |               |   |   |   |
| Replicate 2    |   |   |   |   |   |               |   |   |   |
| Replicate 3    |   |   |   |   |   |               |   |   |   |
| Blank          |   |   |   |   |   |               |   |   |   |
| Synthetic Hard |  |  |  |  |  |               |  |  |  |



|                | Analyst 1 - Experienced<br>(1 year)                                                |                                                                                    |                                                                                    | Analyst 2 - Moderate Experienced<br>(2.5 months)                                   |                                                                                     |                                                                                      | Analyst 3 - Least Experienced<br>(1 week)                                            |                                                                                      |                                                                                      |
|----------------|------------------------------------------------------------------------------------|------------------------------------------------------------------------------------|------------------------------------------------------------------------------------|------------------------------------------------------------------------------------|-------------------------------------------------------------------------------------|--------------------------------------------------------------------------------------|--------------------------------------------------------------------------------------|--------------------------------------------------------------------------------------|--------------------------------------------------------------------------------------|
|                | Rest Stop<br>(M66) Slide 4                                                         | Rest Stop<br>(M66) Slide 5                                                         | Rest Stop<br>(M66) Slide 6                                                         | Rest Stop<br>(M66) Slide 4                                                         | Rest Stop<br>(M66) Slide 5                                                          | Rest Stop<br>(M66) Slide 6                                                           | Rest Stop<br>(M66) Slide 1                                                           | Rest Stop<br>(M66) Slide 2                                                           | Rest Stop<br>(M66) Slide 3                                                           |
| Replicate 1    |   |   |   |   |   |   |   |   |   |
| Replicate 2    |   |   |   |   |   |   |   |   |   |
| Replicate 3    |   |   |   |   |   |   |   |   |   |
| Blank          |   |   |   |   |   |   |   |   |   |
| Synthetic Hard |  |  |  |  |  |  |  |  |  |



|                   | Analyst 1 - Experienced<br>(1 year)                                                |                                                                                    |                                                                                    | Analyst 2 - Moderate Experienced<br>(2.5 months)                                   |                                                                                     |                  | Analyst 3 - Least Experienced<br>(1 week)                                            |                                                                                      |                                                                                      |
|-------------------|------------------------------------------------------------------------------------|------------------------------------------------------------------------------------|------------------------------------------------------------------------------------|------------------------------------------------------------------------------------|-------------------------------------------------------------------------------------|------------------|--------------------------------------------------------------------------------------|--------------------------------------------------------------------------------------|--------------------------------------------------------------------------------------|
|                   | Detroit<br>Slide 1                                                                 | Detroit<br>Slide 2                                                                 | Detroit<br>Slide 3                                                                 | Detroit<br>Slide 1                                                                 | Detroit<br>Slide 2                                                                  | Slide<br>Damaged | Detroit<br>Slide 1                                                                   | Detroit<br>Slide 2                                                                   | Detroit<br>Slide 3                                                                   |
| Replicate<br>1    | 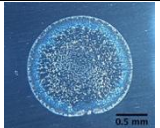  |   |   |   |   |                  |   |   |   |
| Replicate<br>2    |   |   |   |   |   |                  |   |   |   |
| Replicate<br>3    |   |   |   |   |   |                  |   |   |   |
| Blank             |   |   |   |   |   |                  |   |   |   |
| Synthetic<br>Hard |  |  |  |  |  |                  |  |  |  |

|                | Analyst 1 - Experienced<br>(1 year)                                                |                                                                                    |                                                                                    | Analyst 2 - Moderate Experienced<br>(2.5 months)                                   |                                                                                     |                                                                                      | Analyst 3 - Least Experienced<br>(1 week)                                            |                                                                                      |                                                                                      |
|----------------|------------------------------------------------------------------------------------|------------------------------------------------------------------------------------|------------------------------------------------------------------------------------|------------------------------------------------------------------------------------|-------------------------------------------------------------------------------------|--------------------------------------------------------------------------------------|--------------------------------------------------------------------------------------|--------------------------------------------------------------------------------------|--------------------------------------------------------------------------------------|
|                | Grand Rapids,<br>Slide 4                                                           | Grand Rapids,<br>Slide 5                                                           | Grand Rapids,<br>Slide 6                                                           | Grand Rapids,<br>Slide 4                                                           | Grand Rapids,<br>Slide 5                                                            | Grand Rapids,<br>Slide 6                                                             | Grand Rapids,<br>Slide 1                                                             | Grand Rapids,<br>Slide 2                                                             | Grand Rapids,<br>Slide 3                                                             |
| Replicate 1    | 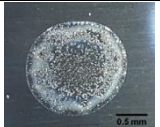  |   |   |   |   |   |   |   |   |
| Replicate 2    |   |   |   |   |   |   |   |   |   |
| Replicate 3    |   |   |   |   |   |   |   |   |   |
| Blank          |   |   |   |   |   |   |   |   |   |
| Synthetic Hard |  |  |  |  |  |  |  |  |  |



**Table SI-6.** Nanochromatography patterns of Michigan tap waters (stored for two months at 4 °C) dried on slides cut from the same sheet of aluminum. Nanopure water synthetic hard water served as controls. The lab temperature was 24 degrees °C and relative humidity was 47-48% for this experiment.

| Minimally treated groundwater                                                       |                                                                                     |                                                                                     |                                                                                     |                                                                                      |                                                                                       |                                                                                       |
|-------------------------------------------------------------------------------------|-------------------------------------------------------------------------------------|-------------------------------------------------------------------------------------|-------------------------------------------------------------------------------------|--------------------------------------------------------------------------------------|---------------------------------------------------------------------------------------|---------------------------------------------------------------------------------------|
| MSU academic building                                                               |                                                                                     |                                                                                     |                                                                                     |                                                                                      | Nanopure                                                                              | Synthetic                                                                             |
| 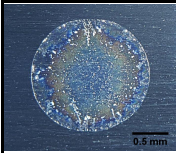   |    |    |    |    |    |    |
| Durand                                                                              |                                                                                     |                                                                                     |                                                                                     |                                                                                      |                                                                                       |                                                                                       |
|    |    |    |    |    |    |    |
| Kalamazoo                                                                           |                                                                                     |                                                                                     |                                                                                     |                                                                                      |                                                                                       |                                                                                       |
|    |    |    |    |    |    |    |
| Portland                                                                            |                                                                                     |                                                                                     |                                                                                     |                                                                                      |                                                                                       |                                                                                       |
|   |   |   |   |   |   |   |
| Battle Creek Site A                                                                 |                                                                                     |                                                                                     |                                                                                     |                                                                                      |                                                                                       |                                                                                       |
|  |  |  |  |  |  |  |
| Battle Creek Site B                                                                 |                                                                                     |                                                                                     |                                                                                     |                                                                                      |                                                                                       |                                                                                       |
|  |  |  |  |  |  |  |
| Fowlerville                                                                         |                                                                                     |                                                                                     |                                                                                     |                                                                                      |                                                                                       |                                                                                       |
|  |  |  |  |  |  |  |
| Charlotte                                                                           |                                                                                     |                                                                                     |                                                                                     |                                                                                      |                                                                                       |                                                                                       |
|  |  |  |  |  |  |  |



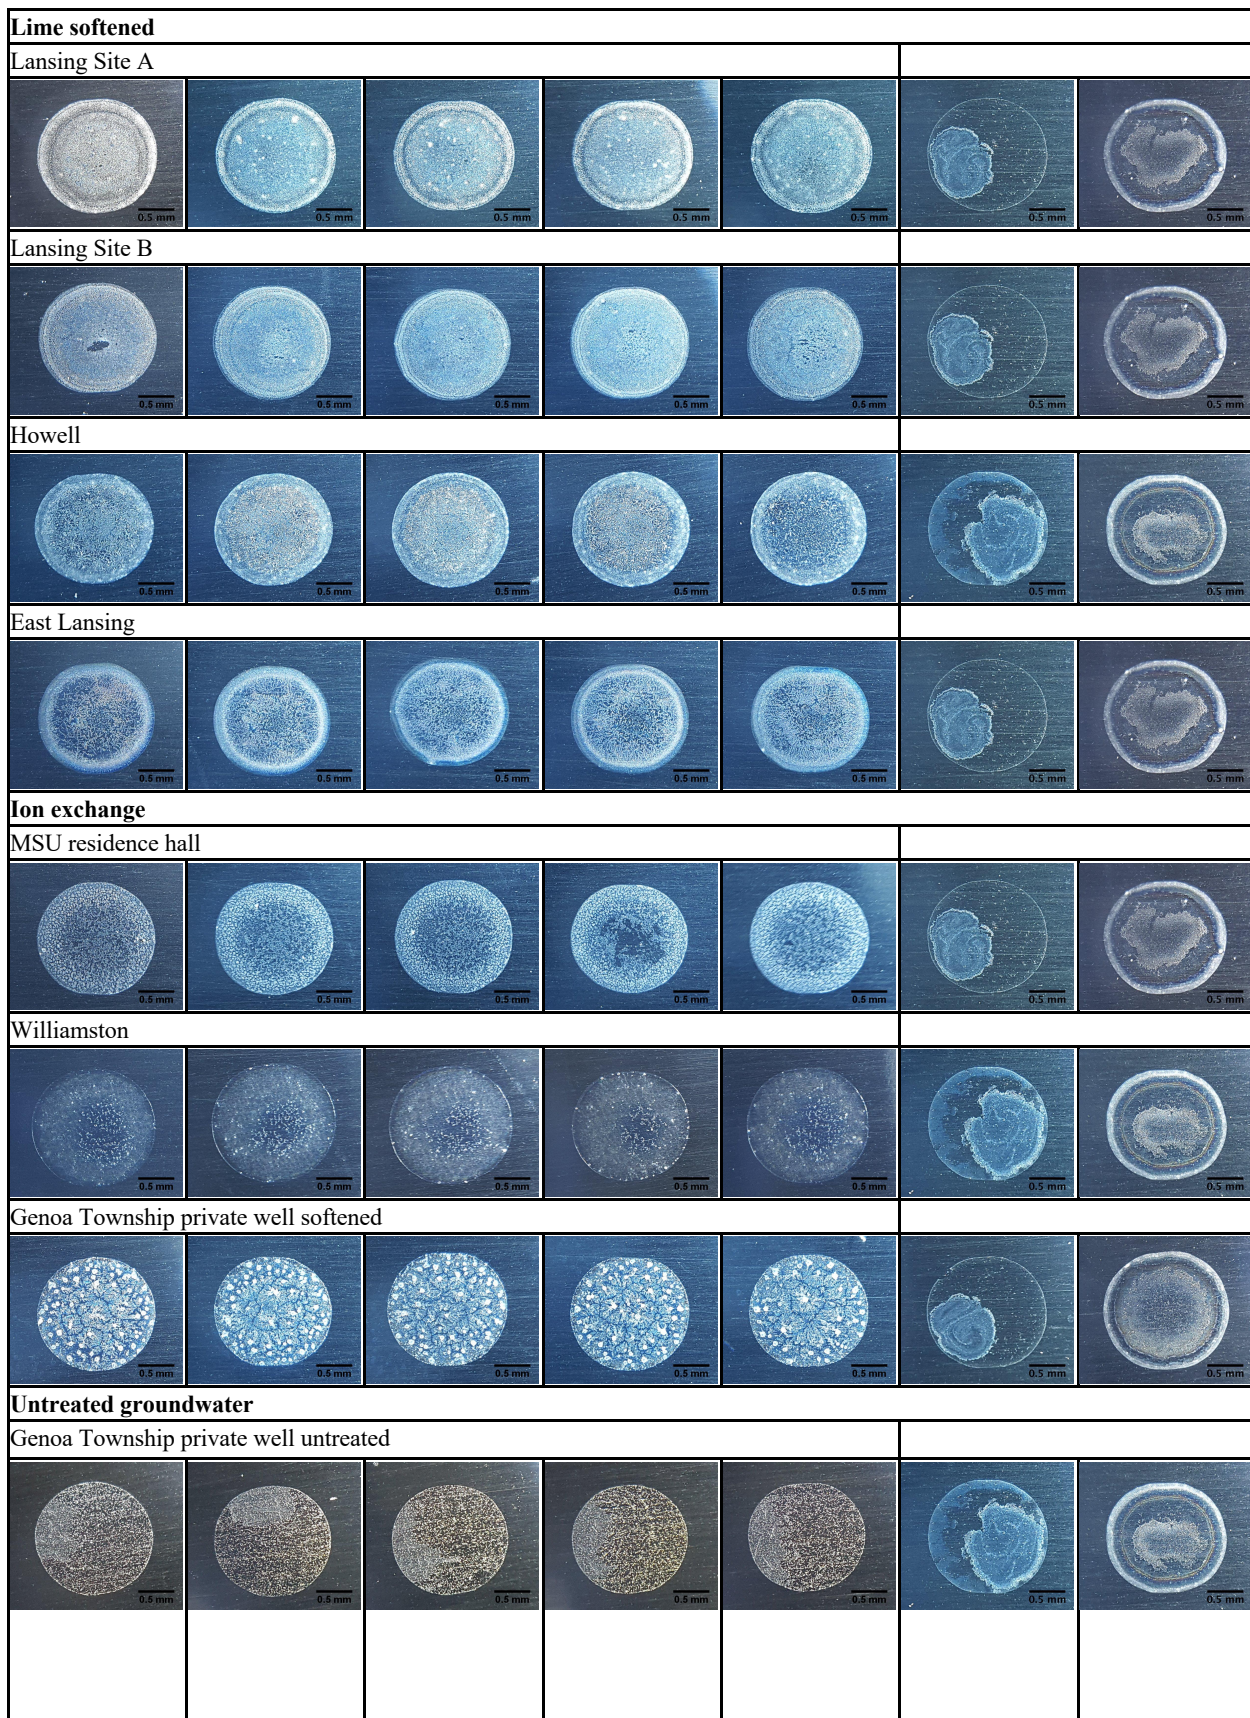



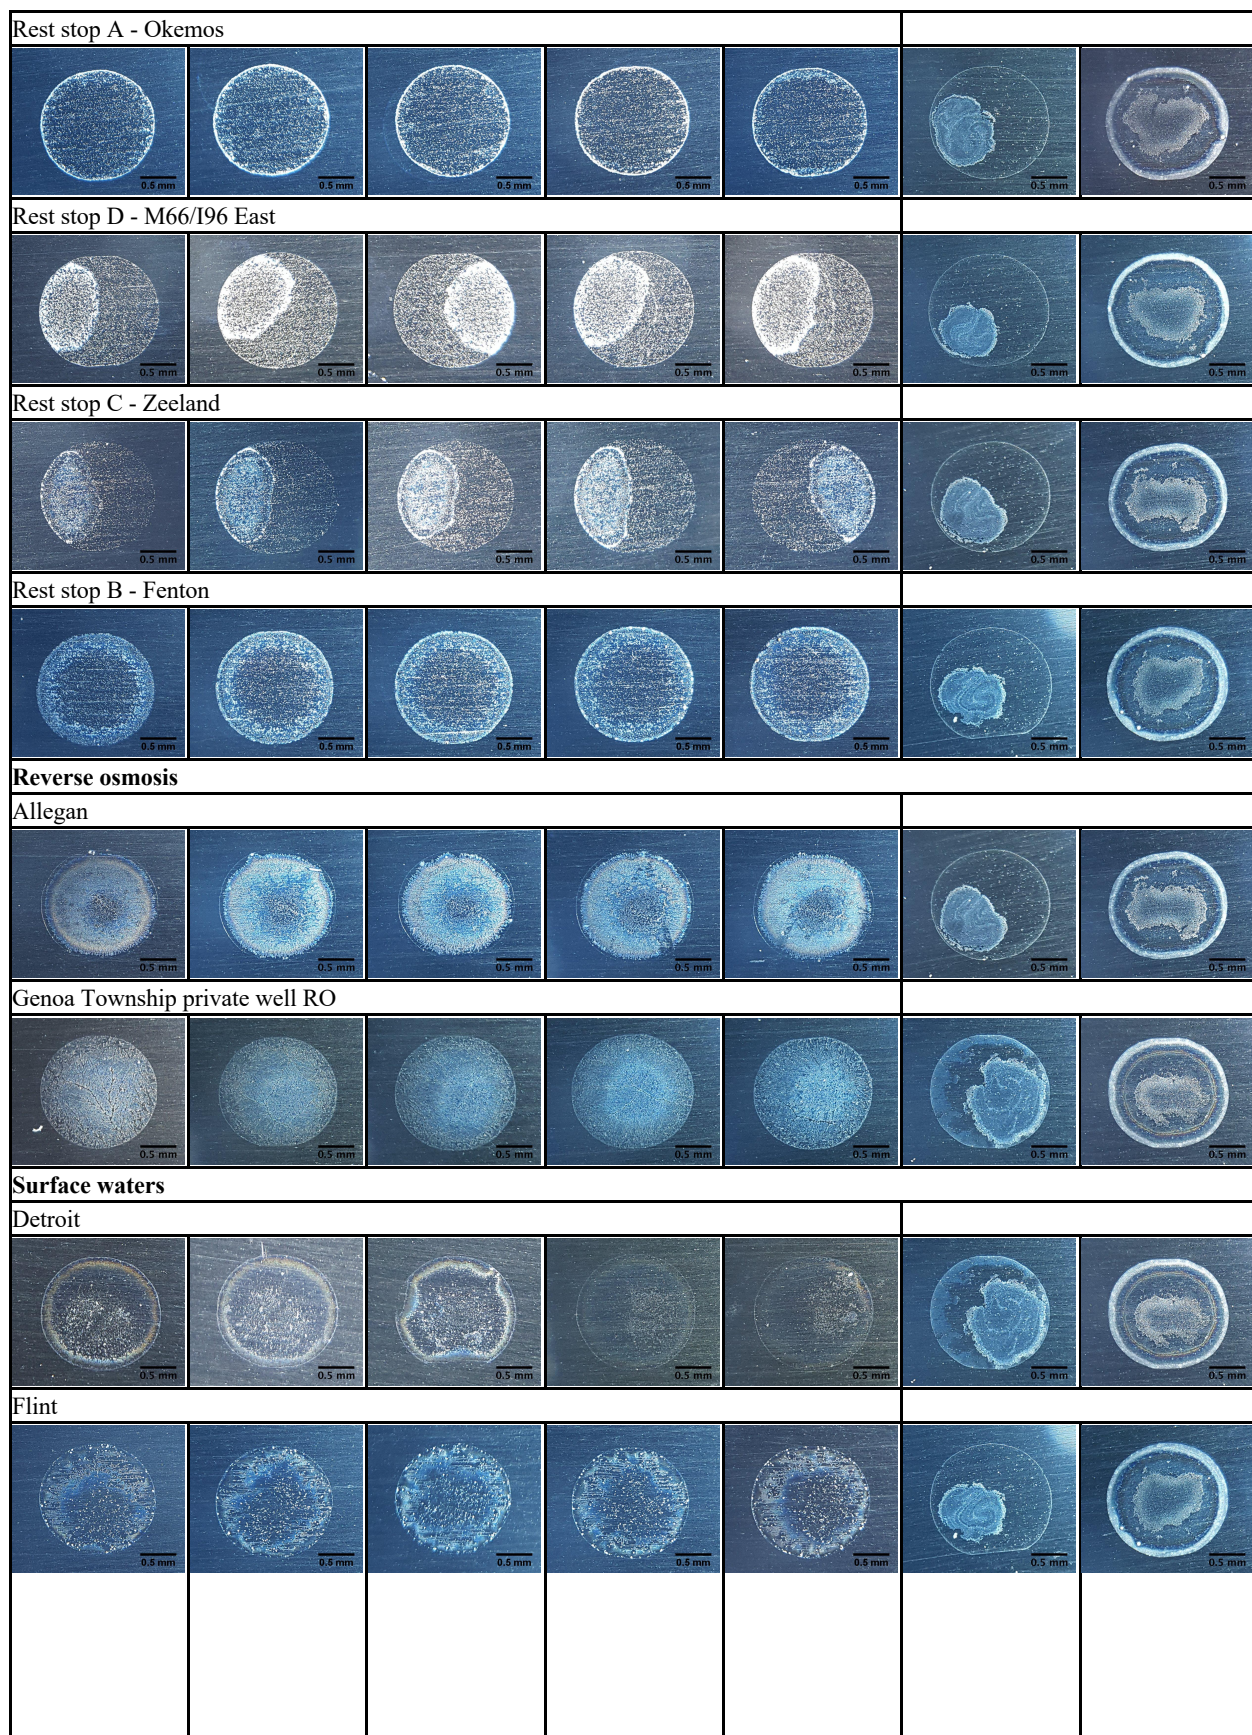



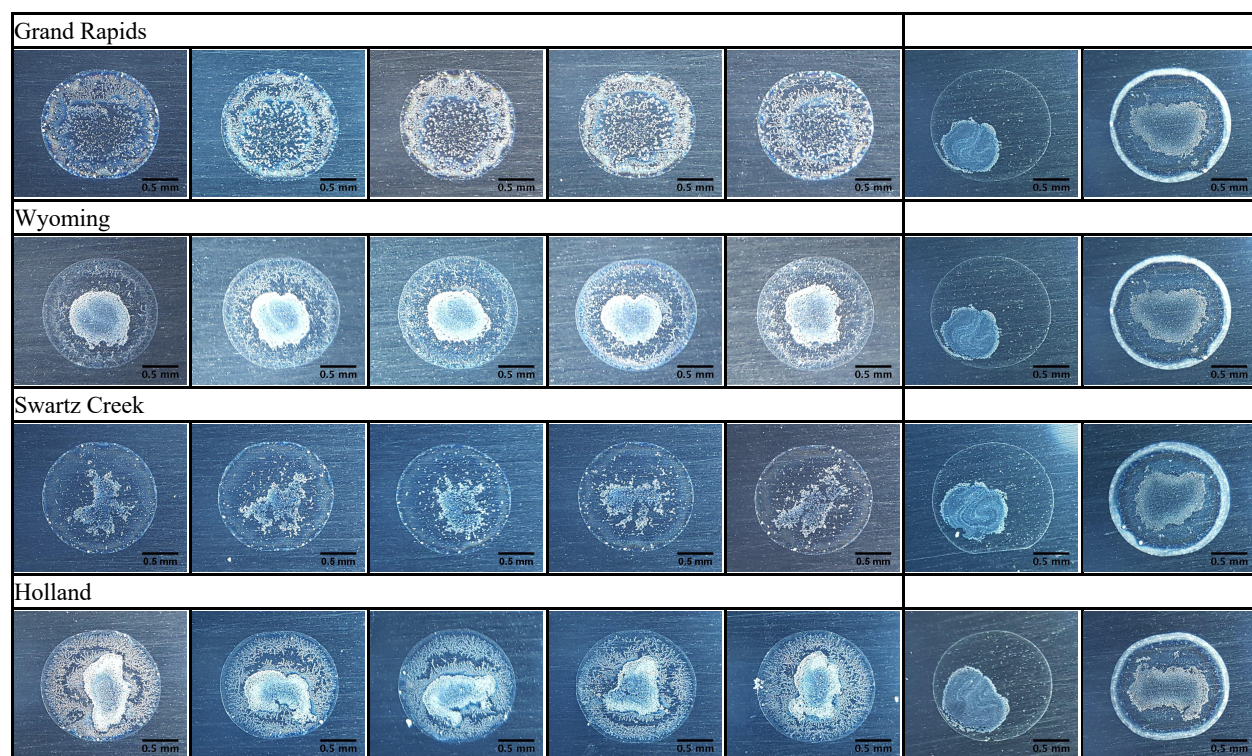

### **Durability of the proposed protocol**

Experiments have been conducted and published elsewhere to document the effects of various parameters on the coffee-ring effect, including the substrate hydrophobicity,<sup>1-4</sup> humidity,<sup>5-7</sup> temperature,<sup>6,8</sup> evaporation rate,<sup>9</sup> volume of droplet,<sup>10</sup> concentration,<sup>2,3,7,8,10,11</sup> and chemical characteristics of the solute.<sup>1,9</sup> In this work, one widely available substrate was used for all measurements, the volume of droplet held constant, the experiments conducted at room temperature and 50% relative humidity, and the lab benches were relatively level ( $\pm 1^\circ$ ). The variations in the coffee-ring effect caused by concentration and chemical characteristics of the solute were harnessed to identify differences in the water chemistry of the sample. The effect of humidity on salt mixtures with four different water chemistries was analyzed, and some samples were more durable to the environmental condition than others (Table SI-6). The frequency of battery changes in the loupe also influences the brightness of the image collected; normalization of image brightness was applied during image processing to alleviate this issue.

**Table SI-7.** Temperature and humidity effect on residue pattern for four salt mixtures.

| Temperature and relative humidity | Drying time (min) | 3 mM $\text{CaCl}_2$<br>1.5 mM $\text{MgCl}_2$<br>10 mM $\text{NaCl}$             | 0.5 mM $\text{CaSO}_4$<br>0.25 mM $\text{MgSO}_4$<br>5 mM $\text{Na}_2\text{SO}_4$ | 0.5 mM $\text{CaSO}_4$<br>0.25 mM $\text{MgSO}_4$<br>10 mM $\text{NaHCO}_3$        | 0.5 mM $\text{CaCl}_2$<br>0.25 mM $\text{MgCl}_2$<br>10 mM $\text{NaHCO}_3$         |
|-----------------------------------|-------------------|-----------------------------------------------------------------------------------|------------------------------------------------------------------------------------|------------------------------------------------------------------------------------|-------------------------------------------------------------------------------------|
| 24 °C<br>< 20% RH                 | 20                | 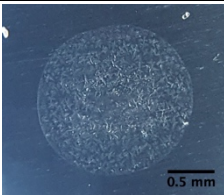 |   |  |  |
| 23 °C<br>46-48% RH                | 25                |  |   |  |  |

Applications of this protocol more broadly would require either control of environmental conditions (e.g., temperature, humidity, and leveled surfaces), generation of an extensive library with residue patterns collected at a variety of temperature and humidity values such that user data could be matched to the appropriate library, or creation of a CNN model that has been trained with a dataset that encompasses variability expected by a broader user base. Additional experiments must be conducted to characterize the extent of control required to produce comparable data, evaluate the cost required for control of experimental conditions, and to harness the environmental conditions to further differentiate between similar tap water chemistries.

In order to further verify that differences exist between tap water residue patterns due to differences in water chemistry and not variation in substrates, all the collected tap waters were tested again on a single set of substrates cut from the same sheet, with more nanopure water and synthetic hard water controls. Samples with different water chemistry still displayed different patterns from each other when tested on the same aluminum sheet, proving that the unique patterns were not obtained simply due to variability in the low-cost substrates. The tap waters had aged for approximately two months at 4 °C, so differences are expected in the patterns due to storage; as samples age, chlorine is consumed, phosphates absorb to plastic bottles, etc. Most of the samples were similar but not identical between the fresh and stored samples, and several samples changed including lime softened water and Swartz Creek (**Figure 3** and **Table SI-7**). Future samples should be tested fresh to reduce variability.

**Table SI-8.** Residue patterns of synthetic tap water solutions compared to real tap water at 24 °C and relative humidity of 47%.

|          | Collected tap water                                                               |                                                                                   |                                                                                   | Simplified synthetic<br>(Calcium, magnesium, sodium,<br>chloride, sulfate, bicarbonate) |                                                                                   |                                                                                    | Complex synthetic<br>(simplified synthetic plus iron,<br>copper, nitrate, fluoride,<br>phosphate) |                                                                                     |                                                                                     |
|----------|-----------------------------------------------------------------------------------|-----------------------------------------------------------------------------------|-----------------------------------------------------------------------------------|-----------------------------------------------------------------------------------------|-----------------------------------------------------------------------------------|------------------------------------------------------------------------------------|---------------------------------------------------------------------------------------------------|-------------------------------------------------------------------------------------|-------------------------------------------------------------------------------------|
| MSU      | 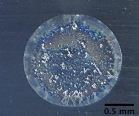 |  |  |        |  |  |                |  |  |
| Detroit  |  |  |  |        |  |  |                |  |  |
| Lansing* |  |  |  |        |  |  |                |  |  |
|          |  |  |  |                                                                                         |                                                                                   |                                                                                    |                                                                                                   |                                                                                     |                                                                                     |

\*The residue pattern for Lansing water was sensitive to the substrate; the second row of patterns for the collected sample shows the range of additional patterns observed for Lansing water.



**Table SI-9.** Simple synthetic mixtures on a separate slides analyzed at 24 °C and 48% relative humidity. The low concentration mixtures that are not the same as the previous table are indicated by bold font.

|                                                                      | NaCl<br>10 mM                                                                     | NaCl<br>5.0 mM                                                                    | NaHCO <sub>3</sub><br>10 mM                                                       | NaHCO <sub>3</sub><br>5.0 mM                                                      |
|----------------------------------------------------------------------|-----------------------------------------------------------------------------------|-----------------------------------------------------------------------------------|-----------------------------------------------------------------------------------|-----------------------------------------------------------------------------------|
| 3 mM CaCl <sub>2</sub> ,<br>1.5 mM<br>MgCl <sub>2</sub>              | 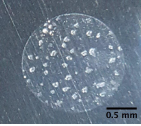 |  |  |  |
| 1 mM CaCl <sub>2</sub> ,<br>0.5 mM<br>MgCl <sub>2</sub>              |  |  |  |  |
| <b>0.1 mM<br/>CaCl<sub>2</sub>,<br/>0.05 mM<br/>MgCl<sub>2</sub></b> |  |  |  |  |

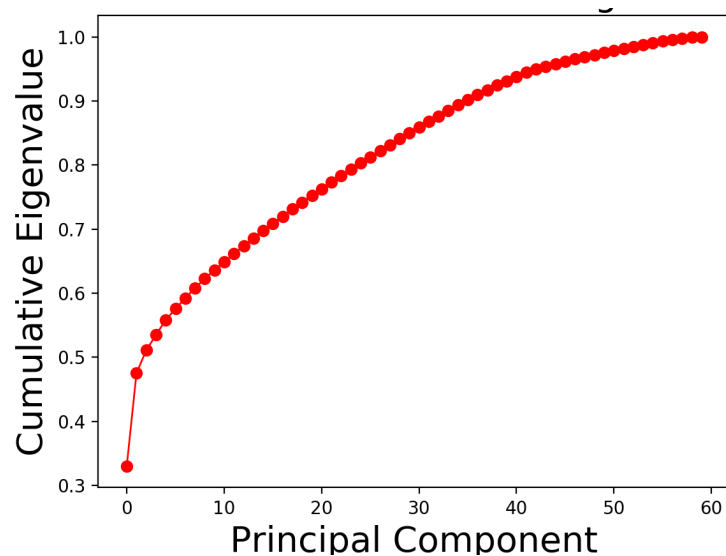

**Figure SI-4.** PCA on the nanochromatography image files for simplified synthetic waters (five replicates of twelve mixtures of salts).

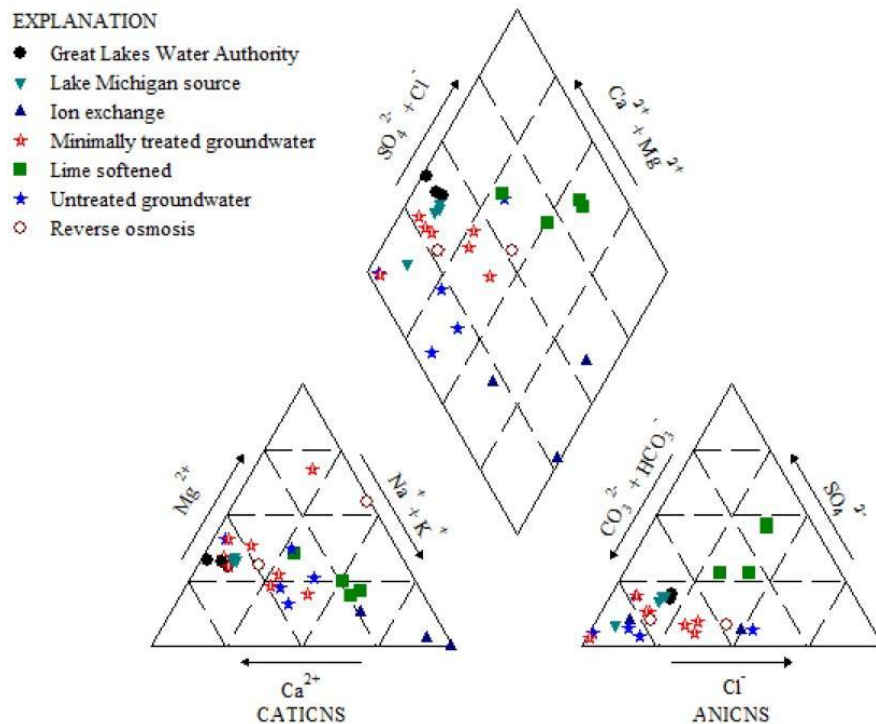

**Figure SI-5.** Trilinear classification of tap water samples organized by treatment technology.

**Table SI-10.** Images with mis-classification percentage above 70%.

| <b>Image is different from other replicates</b>                                     |                                                                                     |                                                                                     |                                                                                      |                                                                                       |
|-------------------------------------------------------------------------------------|-------------------------------------------------------------------------------------|-------------------------------------------------------------------------------------|--------------------------------------------------------------------------------------|---------------------------------------------------------------------------------------|
| Lansing site B                                                                      | MSU residence hall                                                                  | MSU residence hall                                                                  | Portland                                                                             | Portland                                                                              |
|  |  |  |  |  |
| <b>Reason not clear</b>                                                             |                                                                                     |                                                                                     | <b>Images in class two</b>                                                           |                                                                                       |
| Genoa Township private well untreated                                               | Genoa Township private well untreated                                               | Battle Creek site B                                                                 | Genoa Township private well softened                                                 | Genoa Township private well softened                                                  |
|  |  |  |  |  |

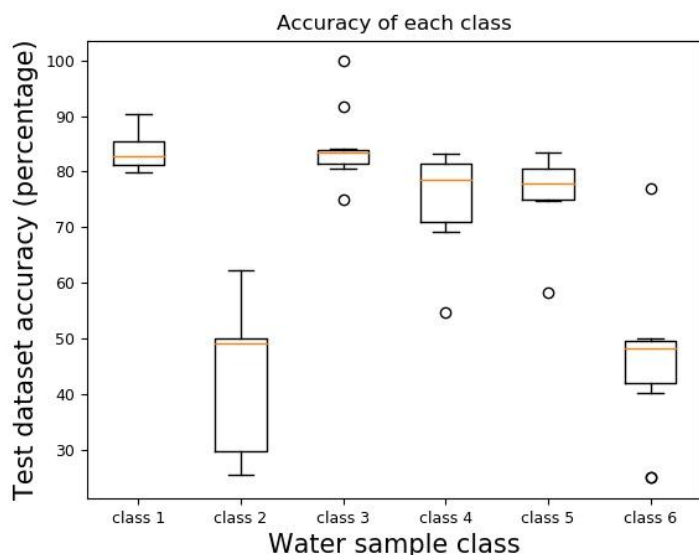

**Figure SI-6:** Test dataset accuracies by class

## References

- 1 N. Shahidzadeh, M. F. Schut, J. Desarnaud, M. Prat and D. Bonn, Salt stains from evaporating droplets, *Sci. Rep.*
- 2 X. Zhong, J. Ren and F. Duan, Wettability Effect on Evaporation Dynamics and Crystalline Patterns of Sessile Saline Droplets, *J. Phys. Chem. B*, 2017, **121**, 7924–7933.
- 3 D. Zhang, Y. Xie, M. F. Mrozek, C. Ortiz, V. J. Davisson and D. Ben-Amotz, Raman Detection of Proteomic Analytes, *Anal. Chem.*, 2003, **75**, 5703–5709.
- 4 C. Ortiz, D. Zhang, Y. Xie, V. J. Davisson and D. Ben-Amotz, Identification of insulin variants using Raman spectroscopy, *Anal. Biochem.*, 2004, **332**, 245–252.
- 5 V. Chhasatia, A. Joshi and Y. Sun, Effect of relative humidity on contact angle and particle deposition morphology of an evaporating colloidal drop, *Appl. Phys. Lett.*, 2011, **97**, 231909–231909.
- 6 Y. Li, Q. Yang, M. Li and Y. Song, Rate-dependent interface capture beyond the coffee-ring effect, *Sci. Rep.*, 2016, **6**, 24628.
- 7 D. Kaya, V. A. Belyi and M. Muthukumar, Pattern formation in drying droplets of polyelectrolyte and salt, *J. Chem. Phys.*, 2010, **133**, 114905.
- 8 P. Takhistov and H.-C. Chang, Complex Stain Morphologies, *Ind. Eng. Chem. Res.*, 2002, **41**, 6256–6269.
- 9 B. Shin, M.-W. Moon and H.-Y. Kim, Rings, Igloos, and Pebbles of Salt Formed by Drying Saline Drops, *Langmuir*, 2014, **30**, 12837–12842.
- 10 C. Ortiz, D. Zhang, Y. Xie, A. E. Ribbe and D. Ben-Amotz, Validation of the drop coating deposition Raman method for protein analysis, *Anal. Biochem.*, 2006, **353**, 157–166.
- 11 T.-S. Wong, T.-H. Chen, X. Shen and C.-M. Ho, Nanochromatography driven by the coffee ring effect, *Anal. Chem.*, 2011, **83**, 1871–1873.
